# Supplementary material for: Identification of cancer risk lncRNAs and cancer risk pathways regulated by cancer risk lncRNAs based on genome sequencing data in human cancers
Source: PubMed Central journal article supplement (PMC5171637; doi:10.1038/srep39294), 2016-12-19

**Identification of cancer risk lncRNAs and cancer risk pathways regulated by  
cancer risk lncRNAs based on genome sequencing data in human cancers**

Yiran Li<sup>1,†</sup>, Wan Li<sup>1,†</sup>, Binhua Liang<sup>2</sup>, Liansheng Li<sup>1</sup>, Li Wang<sup>1</sup>, Hao Huang<sup>1</sup>,  
Shanshan Guo<sup>1</sup>, Yahui Wang<sup>1</sup>, Yuehan He<sup>1</sup>, Lina Chen<sup>1,\*</sup>, Weiming He<sup>3,\*</sup>

<sup>1</sup>College of Bioinformatics Science and Technology, Harbin Medical University,  
Harbin, Hei Longjiang Province, China Postal code:150081

<sup>2</sup>National Microbiology Laboratory, Public Health Agency of Canada, Winnipeg,  
Manitoba, Canada

<sup>3</sup>Institute of Opto-electronics, Harbin Institute of Technology, Harbin, Heilongjiang  
Province, China Postal code:150081

†These authors contributed equally to this work.

\*Corresponding author: Lina Chen, email: chenlina@ems.hrbmu.edu.cn

Weiming He, email: hewm@hit.edu.cn

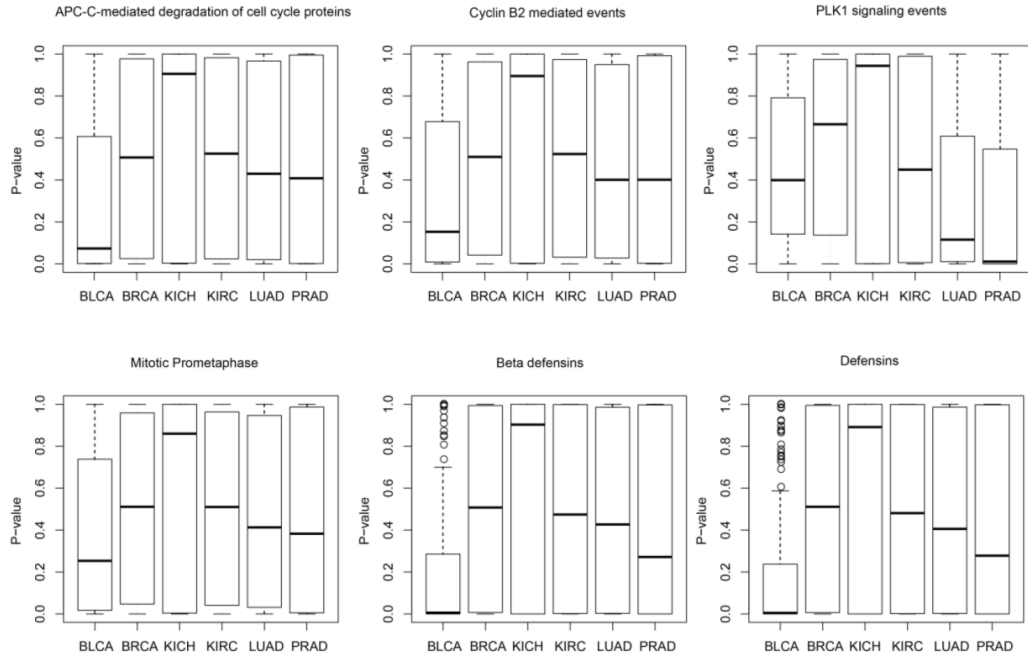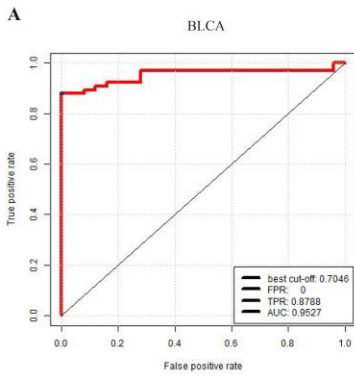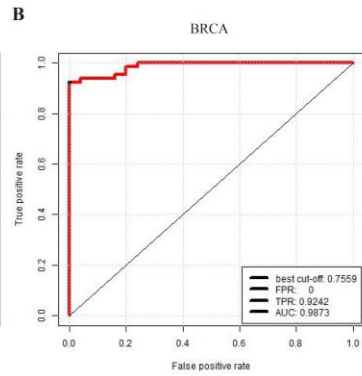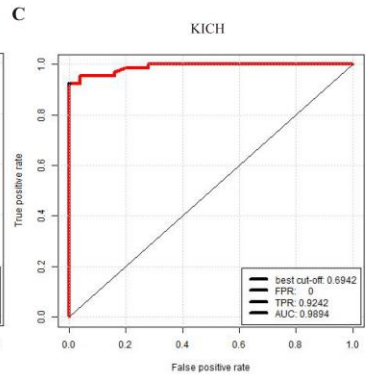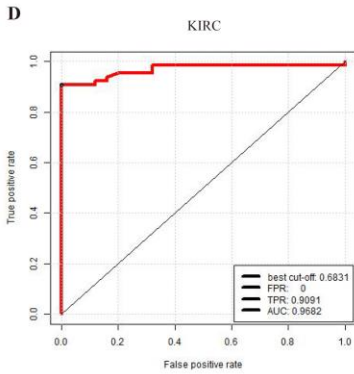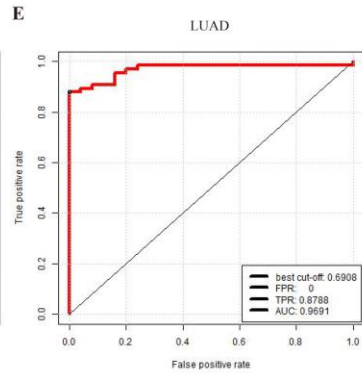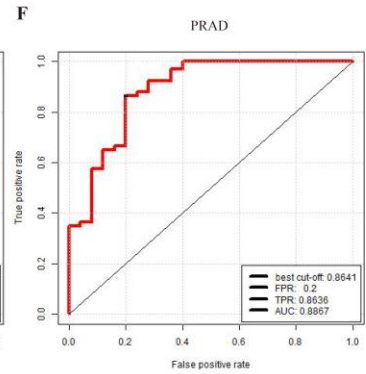

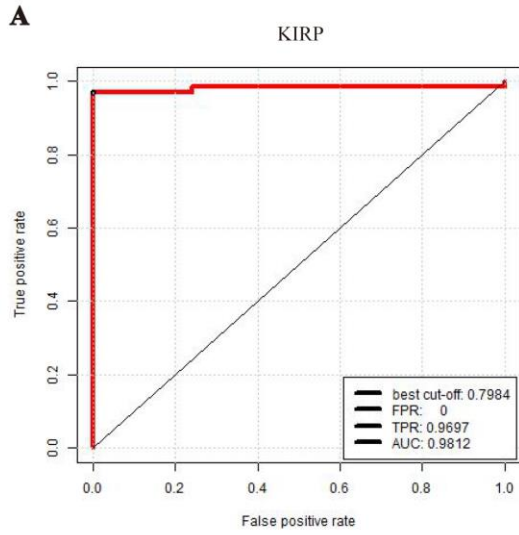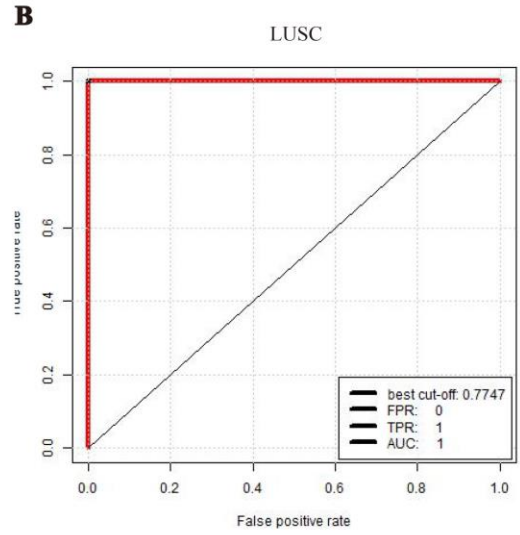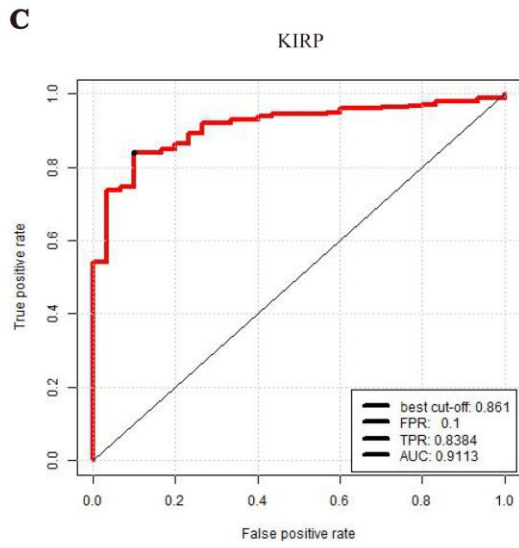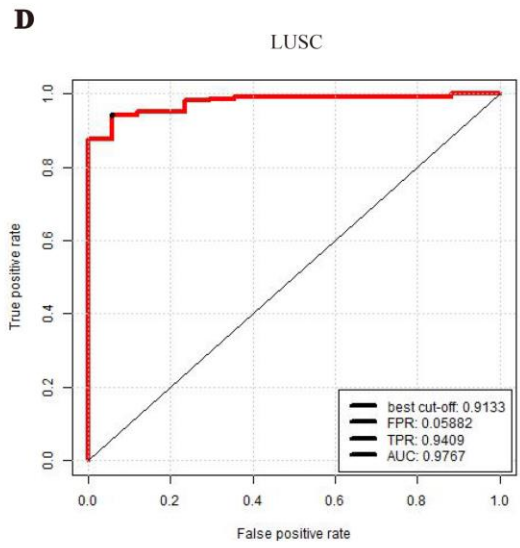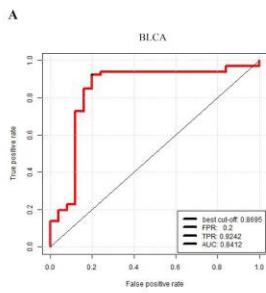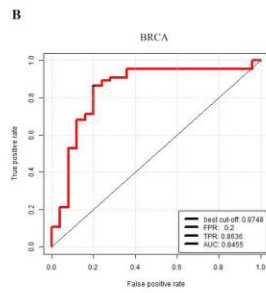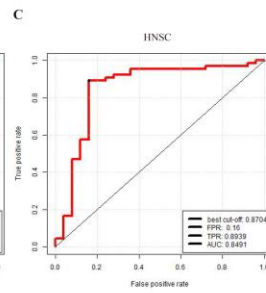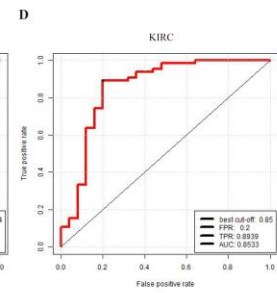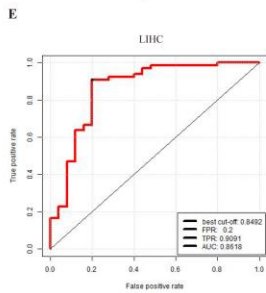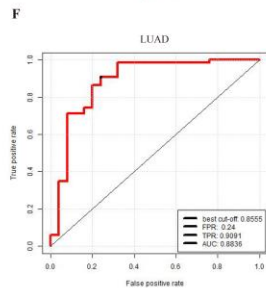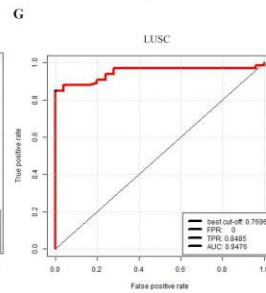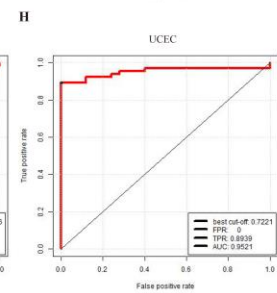

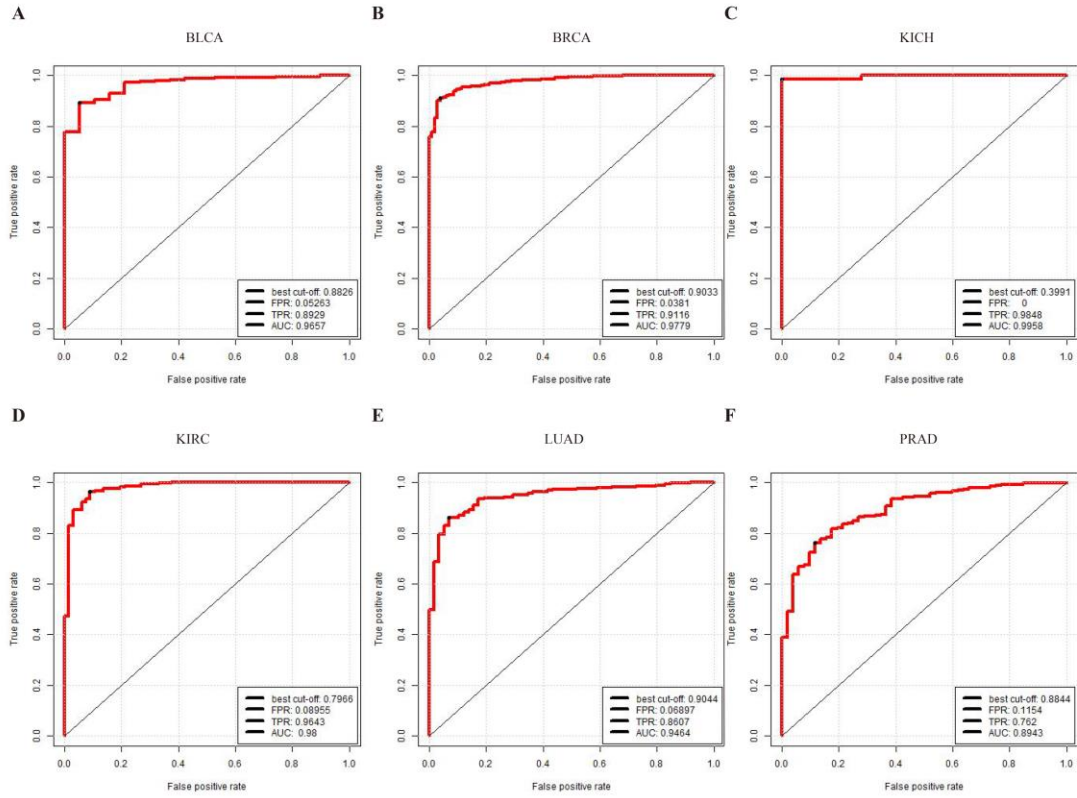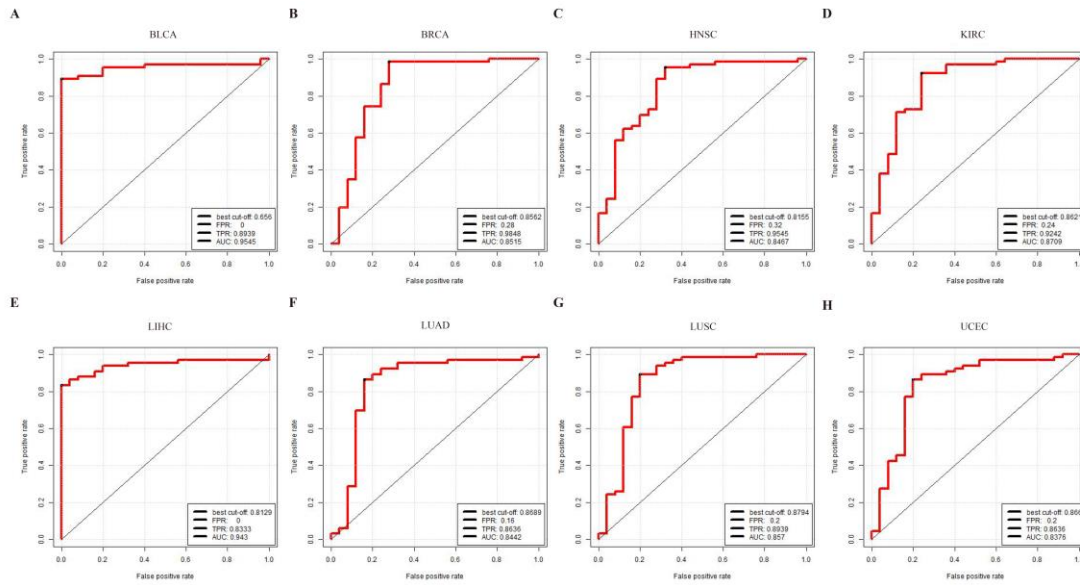

Supplement: srep39294-s1.pdf [file srep39294-s1.pdf]
